# Supplementary material
Source: HighWire-hosted journal article supplement (https://bmjopen.bmj.com/content/15/5/e084978)
Supplement: inline-supplementary-material-3 [file inline-supplementary-material-3.pdf]

## Supplementary Material

### Supplementary file 1

**Supplementary Table 1. Training feedback from test users**

| Item                                                                                  | Frequency (n) | Percentage (%) |
|---------------------------------------------------------------------------------------|---------------|----------------|
| <b>Preferred method of learning</b>                                                   |               |                |
| Formal training                                                                       | 38            | 40             |
| Hands on practice                                                                     | 78            | 83             |
| Watching videos                                                                       | 25            | 27             |
| Learning from peers                                                                   | 10            | 11             |
| Informal learning, personal research                                                  | 9             | 10             |
| <b>Overall satisfaction with training</b>                                             |               |                |
| Not satisfied at all                                                                  | 0             | 0              |
| Not satisfied                                                                         | 2             | 2              |
| Average                                                                               | 2             | 2              |
| Satisfied                                                                             | 21            | 22             |
| Very Satisfied                                                                        | 68            | 72             |
| Missing                                                                               | 1             | 1              |
| <b>Confidence in ability to correctly use the test after training</b>                 |               |                |
| Not confident at all                                                                  | 0             | 0              |
| Not confident                                                                         | 0             | 0              |
| Average                                                                               | 3             | 3              |
| Confident                                                                             | 18            | 19             |
| Very Confident                                                                        | 72            | 77             |
| Missing                                                                               | 1             | 1              |
| <b>What, if anything, would you have liked more of during the training</b>            |               |                |
| Practice using the test                                                               | 18            | 19             |
| Practice interpreting the result                                                      | 22            | 24             |
| Information on common errors and how to avoid them                                    | 23            | 25             |
| Information on the accuracy of the test                                               | 25            | 27             |
| Nothing                                                                               | 5             | 5              |
| <b>Do you wish the training had been longer, shorter, or was it the right length?</b> |               |                |
| Longer                                                                                | 5             | 5              |
| Shorter                                                                               | 8             | 9              |
| Duration of training was appropriate                                                  | 79            | 84             |
| Missing                                                                               | 2             | 2              |
| <b>Open-ended feedback</b>                                                            |               |                |
| <b>Most liked about the training</b>                                                  |               |                |
| Everything                                                                            | 8             | 9              |
| Presenter's presentation skill                                                        | 8             | 9              |
| Practical aspect                                                                      | 50            | 53             |
| The clear, precise and educative nature of training                                   | 23            | 24             |
| <b>Least liked about training</b>                                                     |               |                |
| No refreshments, no projector                                                         | 4             | 4              |
| Nothing                                                                               | 31            | 33             |
| Poor visuals (images, videos, colors)                                                 | 5             | 5              |
| Practical, explanation and documentation                                              | 3             | 3              |
| The urine samples used and how they were handled                                      | 4             | 4              |
| Poor time management (time wasting)                                                   | 15            | 16             |
| <b>Suggested improvements to training</b>                                             |               |                |
| Visuals (images, videos, colors)                                                      | 6             | 6              |
| Samples (acquire fresh samples from eclamptic patients)                               | 8             | 9              |
| Practical aspect, interpretation and documentation of results                         | 13            | 14             |
| PPEs, dustbins, and train more staff                                                  | 7             | 7              |
| Refreshments and allowance                                                            | 4             | 4              |
| Time management and organization                                                      | 16            | 17             |
| None                                                                                  | 19            | 20             |
